# Supplementary material
Source: PubMed Central journal article supplement (PMC7876879)
Supplement: advancesADV2020002910-suppl1.pdf [file advancesADV2020002910-suppl1.pdf]

**Supplemental Figure S1. Exploratory analysis of *PI3K* and *BCR* gene expression profiles and clinical outcomes in 8 patients with available gene expression data.**

| Best response | Outcome data |              |           |              | Tumor RNA expression (WGS) |      |              |          |      |
|---------------|--------------|--------------|-----------|--------------|----------------------------|------|--------------|----------|------|
|               | PFS, months  | Censored PFS | TTD, days | Censored TTD | React PI3K                 | PI3K | Biocarta-BCR | KEGG-BCR | BCR  |
| CR            | 23.2         | 1            | 727       | 1            | 44.1                       | 29.1 | 47.4         | 61.7     | 32.1 |
| PR            | 18.4         | 0            | 880       | 1            | 43.8                       | 29.3 | 47.6         | 62.7     | 33.2 |
| PR            | 10.6         | 1            | 509       | 0            | 43.3                       | 28.7 | 44.2         | 56.4     | 28.2 |
| PR            | 4.8          | 1            | 1306      | 1            | 42.4                       | 27.6 | 42.1         | 55.0     | 27.4 |
| PR            | 5.0          | 1            | 863       | 1            | 41.3                       | 25.5 | 38.0         | 49.2     | 25.8 |
| PR            | 19.5         | 1            | 854       | 1            | 40.8                       | 26.5 | 40.3         | 51.6     | 26.9 |
| SD            | 6.2          | 1            | 245       | 1            | 39.0                       | 23.6 | 35.7         | 47.3     | 22.7 |
| NE            | 1.0          | 0            | 1022      | 1            | 40.6                       | 26.4 | 38.6         | 50.5     | 26.2 |

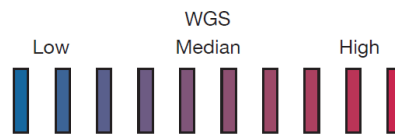

BCR, B-cell antigen receptor; CR, complete response; KEGG, Kyoto Encyclopedia of Genes and Genomes;<sup>1</sup> NE, not evaluable; PFS, progression-free survival; PI3K, pan-class I phosphoinositide 3-kinase; PR, partial response; SD, stable disease; TTD, time to treatment discontinuation; WGS, weighted gene expression score.

## Reference

1. Kanehisa M, Goto S, Kawashima S, Okuno Y, Hattori M. The KEGG resource for deciphering the genome. *Nucleic Acids Res.* 2004;32(1):D277-D280.
